1  
2  
3  
4  
5  
6  
7  
8  
9  
10  
11  
12  
13  
14  
15  
16  
17  
18  
19  
20  
21  
22  
23  
24  
25  
26  
27  
28  
29  
30  
31  
32  
33  
34  
35  
36  
37  
38  
39

## Facilitators and barriers for healthcare workers' adherence to the national nutritional guidelines for people living with HIV in Dar-Es-Salaam: A mixed-method study

Felistar Mwakasungura<sup>1</sup>, Rebecca Mkumbwa<sup>1, \*</sup>, Bruno Sunguya<sup>2</sup>

<sup>1</sup> Department of Development Studies, School of Public Health and Social Sciences, Muhimbili University of Health and Allied Sciences, Dar es Salaam, Tanzania

<sup>2</sup> Department of Community Health, School of Public Health and Social Sciences, Muhimbili University of Health and Allied Sciences, Dar es Salaam, Tanzania

\* Corresponding author

Email: [dicksonrebecca6@gmail.com](mailto:dicksonrebecca6@gmail.com) (RM)

## 1 **Abstract**

2           The dual burden of HIV and malnutrition is a significant public health issue in Sub-Saharan  
3 Africa. In Tanzania, with an HIV prevalence of 4.9% among adults, malnutrition among People  
4 Living with HIV (PLHIV) remains high. This study evaluated adherence to nutritional guidelines  
5 for PLHIV in Care and Treatment Centers (CTCs) in Dar es Salaam and identified influencing  
6 factors. A mixed-method design was used among PLHIV, health facility administrators, and  
7 healthcare providers. Data were collected through observational checklists, structured  
8 questionnaires, and in-depth interviews. Statistical and qualitative analyses were performed to  
9 assess adherence and determinants. Among 478 participants who received care, only 19.46% were  
10 managed with fully adherence to the nutritional guidelines. Universally, anthropometric  
11 assessments were observed, however, micronutrient supplementation was minimal (1%). Higher  
12 education (AOR=5.08, p=0.019) and attendance at referral hospitals (AOR=8.23, p=0.032)  
13 positively influenced adherence. Conversely, nurse attendance (AOR=0.34, p=0.038), adequate  
14 staffing (AOR=0.31, p=0.010), and urban residence (AOR=0.47, p=0.009) negatively influenced  
15 adherence. Key facilitators included consistent training and supportive leadership, while barriers  
16 involved financial constraints and high staff turnover. The study reveals a significant gap in  
17 adherence to nutritional guidelines among PLHIV in Dar es Salaam, highlight the need for  
18 improved resource distribution, staff training, and patient education. Findings from this study aim  
19 to bridge the knowledge gap in adherence to nutritional guidelines for PLHIV, support evidence-  
20 based decision-making, and ultimately improve health outcomes.

## 21 Introduction

22 Human Immunodeficiency Virus (HIV) remains a critical global health issue, with  
23 approximately 39 million people living with the virus as of 2022 [1]. Characterized by immune  
24 system suppression, HIV exacerbates nutritional challenges [2], particularly in low- and middle-  
25 income countries (LMICs). In Sub-Saharan Africa, which accounts for 66% of the global HIV  
26 population [3], the prevalence of malnutrition among People Living with HIV (PLHIV) is  
27 alarmingly high, at 23.7% [4]. This is compounded by a regional malnutrition rate of 21% [5].

28 The interaction between HIV and malnutrition creates a detrimental cycle [6]. HIV not  
29 only increases nutritional requirements [7], but also impairs the body's ability to meet these needs  
30 due to symptoms such as oral thrush, painful swallowing, and nausea [8]. As a result,  
31 asymptomatic HIV-positive individuals need 10% more energy, while those with symptomatic  
32 HIV require 20-30% more energy compared to HIV-negative individuals [9]. This heightened  
33 energy demand, coupled with reduced food intake, further compromises the immune system,  
34 which is already weakened by HIV [7]. Nutritional care, when integrated with antiretroviral  
35 therapy (ART), can significantly improve health outcomes [10]. However, despite ART's success  
36 in reducing HIV-related morbidity and mortality, nutritional concerns persist [11]. A severe  
37 shortage of healthcare workers skilled in nutritional care, particularly in Sub-Saharan Africa,  
38 exacerbates this issue [12]. As a result, about 10% of PLHIV in Care and Treatment Centers  
39 (CTCs) are undernourished, while others face issues of overweight and obesity [10].

40 In Tanzania, where HIV prevalence among adults stands at 4.9% [13], which 19.4% of  
41 PLHIV attending CTCs are malnourished [14]. The Tanzanian government has shown  
42 commitment to addressing both HIV and malnutrition through policies and guidelines such as the  
43 "National Guidelines for Nutrition Care and Support for People Living with HIV" and the "Health

44 Sector HIV/AIDS Strategic Plan” [6]. These frameworks aim to improve nutritional care by  
45 integrating it into comprehensive health services, including assessment, education, counseling, and  
46 supplementation [6]. The “National HIV/AIDS Council Strategic Framework 2011-2015”  
47 emphasizes the importance of healthy eating and lifestyle as part of HIV care. The 2016 national  
48 guidelines for Nutrition Care and Support aim to coordinate nutrition programming, provide  
49 consistent information, and ensure that healthcare services include essential nutrition components  
50 such as assessment, education, counseling, and therapeutic feeding [6]. Despite these  
51 comprehensive strategies, the dual burden of HIV and malnutrition remains prevalent, impeding  
52 progress towards the 95-95-95 targets for HIV/AIDS elimination [15].

53 Evidence on adherence to these nutritional guidelines at the CTC level in Tanzania is  
54 scarce. The lack of data on guideline adherence and the factors influencing it continues to affect  
55 the quality of care and treatment outcomes for PLHIV, slowing progress towards effective HIV  
56 management and elimination goals. This study aims to evaluate the adherence to the National  
57 Guidelines for Nutrition Care and Support and to identify the facilitators and challenges associated  
58 with adherence in CTC clinics.

## 59 **Materials and methods**

### 60 **Study design and area**

61 The study was conducted across Care and Treatment Centers (CTCs) in Kinondoni,  
62 Temeke, Ilala, Ubungo, and Kigamboni districts of Dar es Salaam, encompassing urban and  
63 suburban areas. In 2023, more than 1.7 million people were living with HIV nationwide with  
64 approximately 4.7% of people living with HIV reside in Dar es Salaam [13], which encompassing  
65 nearly 10% of the country’s total population. This evaluation adopted the explanatory sequential

66 mixed-method design, which had two phases which spanned between 29<sup>th</sup> April and 27<sup>th</sup> May  
67 2024; A quantitative phase focused on level of adherence based on the observation of the  
68 researcher and patient feedbacks, whose results were used to build on the second phase of  
69 qualitative phenomenological design, targeting experiences of health care workers on providing  
70 care.

## 71 **Study population and sampling**

72 *Quantitative phase;* A total of 485 PLHIV were approached for the study, of which  
73 7(1.46%) refused to participate. Sample size was calculated using a cross-sectional study formula  
74 from Kish and Leslie (1965) with (p) of PLHIV's adherence as 50%, and margin of error (E) set at  
75 5%, and accounting for a 20% non-response rate. A multi-stage sampling method was employed  
76 to select 25 public health facilities with CTC clinics were selected using a multi-stage sampling  
77 method. From each of the facilities 19 participants were conveniently selected. Patients and  
78 treatment supporters who attended CTC clinics, health facility in-charges, doctors, nurses, and  
79 nutritionists who consented to participate were included. The exclusion criterion was clients  
80 experiencing acute medical distress at the time of data collection. *Qualitative Phase:* Thirteen  
81 healthcare providers were purposively approached and consented to participate in the study, ages  
82 ranged from 24 to 51 years, majority being male, five clinical officers, four nurses, three  
83 nutritionists, and two medical doctors, with their experience in working at CTCs ranging from one  
84 to eighteen years.

## 85 **Variables and measurements**

86 Adherence level was the dependent variable, assessed using the Minimum Nutrition  
87 Package (MNP) per National Nutritional guideline, which contains a total of nine  
88 recommendations categorized into four core components: Nutrition Assessment, Education and

89 Counseling, Therapeutic/Supplementary Feeding, and Referral/Follow-Up Services. Adherence  
90 was measured using a binary scoring system, with scores of 6 or more indicating adherence and  
91 scores below 5 indicating non-adherence, based on the Index Measuring Adherence to  
92 Complementary Feeding Guidelines [16, 17]. Independent variables including healthcare provider  
93 characteristics, health facility characteristics, resources and tools, training and supervision factors  
94 and patient characteristics, adopted from the Tanzania Demographic Health Survey (TDHS) [18],  
95 Tanzania Food and Nutrition Center (TFNC) [6], and Evaluation of facility level on NACS guide  
96 tool [19].

## 97 **Data collection and quality assurance**

98 *Quantitative Phase:* A structured questionnaire was translated to Kiswahili. The Kiswahili  
99 version was uploaded on Kobo Collect. The questionnaire was tested on a pilot population at Tip  
100 top dispensary and Toagoma dispensary. The collected data were cleaned, processed, and securely  
101 stored in cloud storage to maintain confidentiality. This was complemented by Cronbach's Alpha  
102 of 0.71. *Qualitative Phase:* In depth interview were conducted using tested semi structured  
103 interview guide, researcher recorded verbal and took notes on the non- verbal expressions.

## 104 **Data management and analysis**

105 *Quantitative Phase:* Stata version 18 (Stata Corp, College Station, TX, USA) was used for  
106 analysis. Descriptive statistics were generated as mean and standard deviation for continuous  
107 variables, and frequencies and percentages for categorical variables. Bivariate and multivariate  
108 analyses were used to identify the significant determinants influencing adherence while adjusting  
109 for potential confounders. A threshold p-value of less than 0.05 was set for statistical significance.  
110 *Qualitative Phase:* It began with data familiarization, where audio recordings were transcribed  
111 verbatim and then translated from Swahili to English. A code book was developed to identify

112 domains and generate initial codes. NVivo software was used to manage and analyze the data,  
113 facilitating cross-referencing of the 13 transcripts and organizing codes. Each code was thoroughly  
114 analyzed to capture the context and narrative of interviewees, providing a deep understanding of  
115 the facilitators and barriers related to adherence.

## 116 **Ethical approval and informed consent**

117 Permissions were granted by the health facilities involved. Ethical clearance was secured  
118 from the MUHAS Institutional Review Board (Reference No. DA.282/298/01.C/2156). All  
119 participants provided written informed consent, which detailed the study's objectives, as well as  
120 information on data privacy and confidentiality. Participants who did not receive services in line  
121 with the standard guidelines were counseled to address the discrepancies.

## 122 **Results**

### 123 **Quantitative findings**

#### 124 **Socio-demographic characteristics of participants**

125 A total of 478 participants were recruited for this study, with 351 (73.43%) being female.  
126 The mean age of the participants was 42 years (SD: 12.06). Most participants, 158 (33.1%), were  
127 aged 45-54 years. Additionally, 278 (58.16%) of the participants resided in urban areas, and 154  
128 (32.22%) were married. A significant portion, 319 (66.74%), had a primary education, and over  
129 the past 12 months, 393 (82.22%) reported having an income source “Table 1”

130 **Table 1: Socio-Demographic Characteristics of Participants (n=478).**

| <b>Variable</b> | <b>Category</b> | <b>Frequency</b> | <b>Percentage (%)</b> |
|-----------------|-----------------|------------------|-----------------------|
| <b>Gender</b>   | Female          | 351              | 73.43                 |
|                 | Male            | 127              | 26.57                 |

|                           |                     |     |       |
|---------------------------|---------------------|-----|-------|
| <b>Age</b>                | 15-24 years         | 27  | 5.65  |
|                           | 25-34 years         | 87  | 18.20 |
|                           | 35-44 years         | 141 | 29.50 |
|                           | 45-54 years         | 158 | 33.05 |
|                           | 55-64 years         | 50  | 10.48 |
|                           | 65+ years           | 15  | 3.14  |
| <b>Residence</b>          | Suburban            | 200 | 41.84 |
|                           | Urban               | 278 | 58.16 |
| <b>Marital Status</b>     | Widowed             | 61  | 12.76 |
|                           | Married             | 154 | 32.22 |
|                           | Living Together     | 55  | 11.51 |
|                           | Divorced/Separated  | 105 | 21.97 |
|                           | Never Married       | 103 | 21.55 |
| <b>Income Source</b>      | No                  | 85  | 17.78 |
|                           | Yes                 | 393 | 82.22 |
| <b>Education Level</b>    | Higher Education    | 19  | 3.97  |
|                           | Secondary Education | 89  | 18.62 |
|                           | Primary Education   | 319 | 66.74 |
|                           | No Education        | 51  | 10.67 |
| <b>Level of Facility</b>  | Referral Hospital   | 58  | 12.13 |
|                           | Hospital            | 40  | 8.37  |
|                           | Health Center       | 124 | 25.94 |
|                           | Dispensary          | 256 | 53.56 |
| <b>Profession (Cadre)</b> | Medical Doctor      | 185 | 38.7  |
|                           | Clinical Officer    | 196 | 41    |
|                           | Nurse               | 97  | 20.29 |
| <b>Ever done CD4 test</b> | No                  | 35  | 7.43  |
|                           | Yes                 | 443 | 92.68 |

131

## 132 **Characteristics of selected ctc clinics**

133           The study included 25 Care and Treatment Clinics (CTCs) in Dar es Salaam. Among these,  
134 dispensaries were 15(60%), with a mean volume of 2322 clients (SD: 2097.3). Additionally,  
135 19(76%) of the clinics had at least minimum required number of staffs allocated. However,  
136 16(64%) did not have staff who had received training. Furthermore, 15(60%) of the facilities did  
137 not receive any support supervision, and among those received supervision 15(60%) reported that  
138 did not receive feedback. The majority of the clinics, 24(96%) of the clinics had an assigned



139 weighing scale, and 23(92%) had an assigned stadiometer. Moreover, 17(68%) did not have a  
 140 MUAC tape “Table 2”.

141 **Table 2: Characteristics of Selected CTC Clinics in Dar es Salaam (n=25)**

| Variable                                   | Category                       | Frequency | Percentage (%) |
|--------------------------------------------|--------------------------------|-----------|----------------|
| <b>Type of Health Facility</b>             | Referral Hospital              | 3         | 12             |
|                                            | Hospital                       | 2         | 8              |
|                                            | Health Center                  | 5         | 20             |
|                                            | Dispensary                     | 15        | 60             |
| <b>Number of Staff Allocated</b>           | Inadequate                     | 6         | 24             |
|                                            | Adequate                       | 19        | 76             |
| <b>With Trained Staff</b>                  | No                             | 16        | 64             |
|                                            | Yes                            | 9         | 36             |
| <b>Received Support Supervision</b>        | No                             | 15        | 60             |
|                                            | Yes                            | 10        | 40             |
| <b>Received Feedback After Supervision</b> | Don't Know                     | 2         | 8              |
|                                            | No                             | 15        | 60             |
|                                            | Yes                            | 8         | 32             |
| <b>Weighing Scale Available</b>            | Yes, Assigned                  | 24        | 96             |
|                                            | Yes, Shared with other clinics | 1         | 4              |
|                                            | No                             | 0         | 0              |
| <b>Stadiometer Available</b>               | No                             | 1         | 4              |
|                                            | Yes, Assigned                  | 23        | 92             |
|                                            | Yes, Shared with other clinics | 1         | 4              |
| <b>MUAC Available</b>                      | No                             | 17        | 68             |
|                                            | Yes, Assigned                  | 7         | 28             |
|                                            | Yes, Shared with other clinics | 1         | 4              |

142

143 **Adherence of guideline in selected CTCs.**

144 Out of the 478 participants, 93 (19.46%) PLHIV received treatment which has fully adhere  
 145 to the national nutrition guidelines. While follow-up care and anthropometric assessments were  
 146 universally implemented (100%), the provision of micronutrient supplements was significantly  
 147 lacking, with only 1% of participants receiving them “Figure 1”.

148

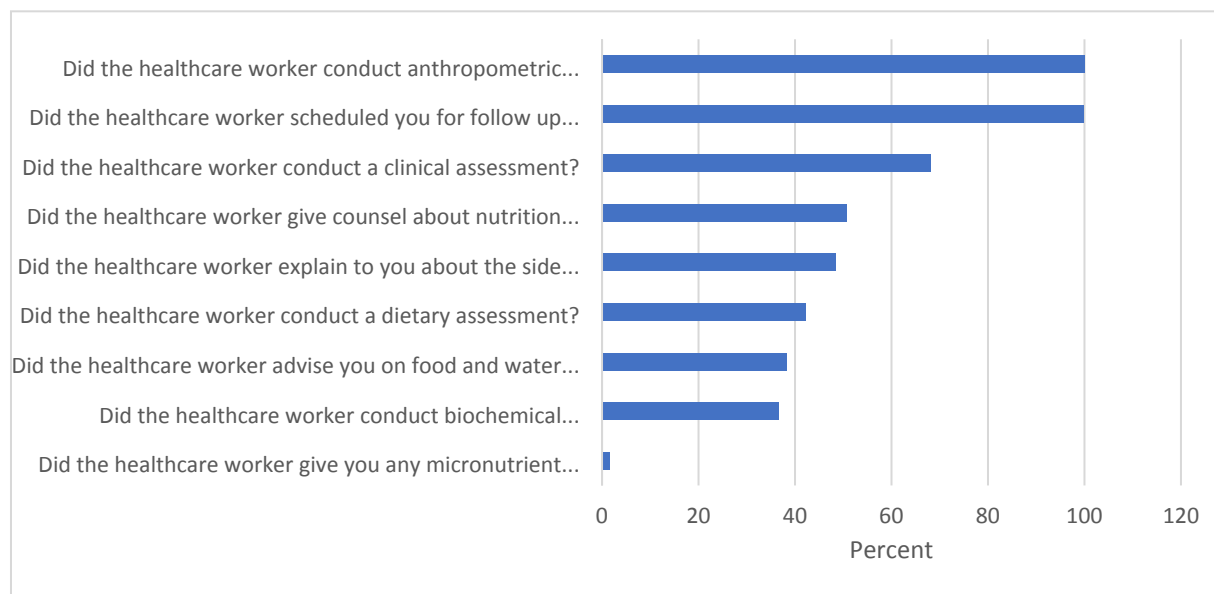

149

150 **Figure 1. Adherence to Specific Aspects of Nutritional Care Guidelines**

151 Adherence rates to guidelines varied across different types of healthcare facilities. Referral  
152 hospitals had the highest adherence rate at 40%, indicating a strong compliance with the  
153 guidelines. Hospitals and health centers both showed moderate adherence rates, each at 25%.  
154 Dispensaries had the lowest adherence rate at 10%, suggesting potential challenges in maintaining  
155 guideline compliance in these facilities “figure 2”.

156

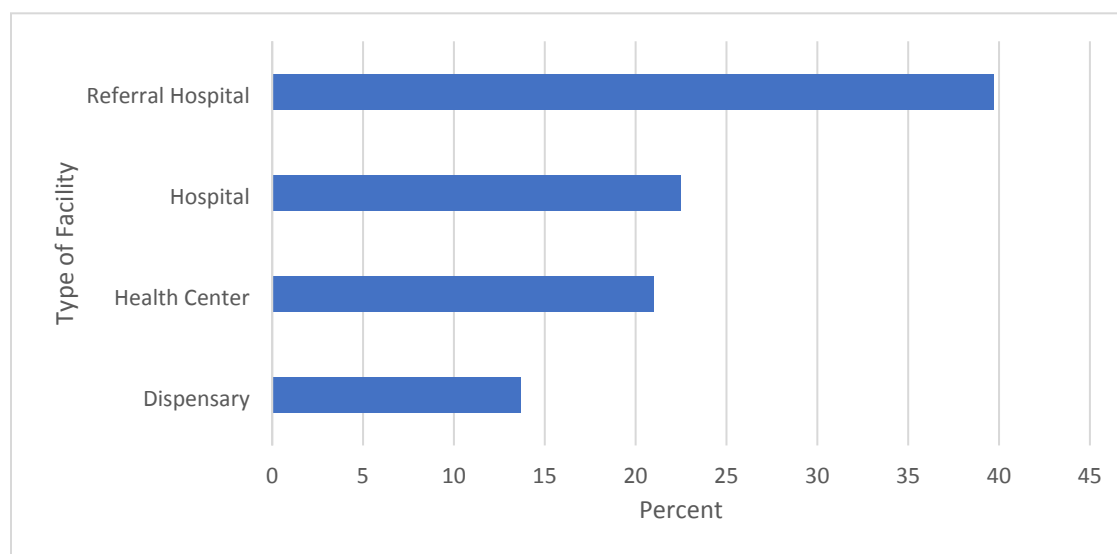

157

158 **Figure 2: Adherence to the level of the facilities.**

159

## 160 **Determinants of adherence to guideline**

161 In bivariate analysis, residence emerged as a significant determinant of adherence to the  
162 National Guidelines for Nutritional Care and Support. Higher adherence was observed in suburban  
163 areas 24%, (n=48) compared to urban areas 16.2%, (n=45) ( $\chi^2 = 4.5309$ ,  $p = 0.033$ ).

164 During multivariate analysis, several factors were identified as influencing adherence to  
165 nutritional guidelines among participants. Clients with higher education were significantly more  
166 likely to receive care that adhered to the National Guidelines for Nutrition Care and Support, with  
167 a 5.08 times higher adherence rate compared to those with no education (AOR=5.08; 95% CI:  
168 1.30-19.79;  $p=0.019$ ). Additionally, clients attending referral hospitals had a notably higher  
169 likelihood of receiving care that adhered to the National Guidelines, with an 8.23 times higher  
170 adherence rate compared to those attending dispensaries (AOR=8.23; 95% CI: 1.19-56.59;  
171  $p=0.032$ ).

172 Conversely, participants who were attended by nurses were less likely to receive care that

173 adhered to the National Guideline for Nutrition Care and Support compared to those attended by  
 174 doctors, with an AOR of 0.34 (95% CI: 0.70-4.42; p=0.038). Adequate staffing was associated  
 175 with a lower likelihood of receiving care that adhered to the National Guideline for Nutrition Care  
 176 and Support compared to having inadequate staffing, with an AOR of 0.31 (95% CI: 0.13-0.76;  
 177 p=0.010). Urban residents were also less likely to receive care that adhered to the Nutrition  
 178 guideline compared to those in sub-urban areas (AOR=0.47; 95% CI: 0.27-0.82; p=0.009) “Table  
 179 3”.

180 **Table 3. Multivariate Logistic Regression Analysis of Factors Associated with Adherence.**

| Variable Categories     | andTotal (n) | COR (95% CI)     | P-Value | AOR (95% CI)     | P-Value |
|-------------------------|--------------|------------------|---------|------------------|---------|
| <b>Age Category</b>     |              |                  |         |                  |         |
| 15-24                   | 27           | 1                |         | Ref              |         |
| 25-34                   | 87           | 0.78(0.27-2.26)  | 0.66    | 1.30(0.38-0.43)  | 0.671   |
| 35-44                   | 141          | 0.68(0.24-1.87)  | 0.45    | 0.99(0.29-3.39)  | 0.992   |
| 45-54                   | 158          | 0.95(0.35-2.56)  | 0.935   | 1.45(0.43-4.93)  | 0.545   |
| 55-64                   | 50           | 0.87(0.27-2.74)  | 0.819   | 1.14 (0.29-4.53) | 0.845   |
| 65+                     | 15           | 1.2(0.29-5.48)   | 0.746   | 0.74(0.13-4.19)  | 0.740   |
| <b>Gender</b>           |              |                  |         |                  |         |
| Female                  | 351          | 1                |         | Ref              |         |
| Male                    | 127          | 0.95(0.56-1.59)  | 0.853   | 0.82(0.45-1.50)  | 0.539   |
| <b>Education Level</b>  |              |                  |         |                  |         |
| No education            | 51           | 1                |         | Ref              |         |
| Primary                 | 319          | 1.10(0.51-2.3)   | 0.803   | 1.42(0.59-3.40)  | 0.423   |
| Secondary               | 89           | 1.02(0.41-2.51)  | 0.961   | 1.40(0.50-3.89)  | 0.511   |
| Higher                  | 19           | 2.72(0.83-8.83)  | 0.096   | 5.08(1.30-19.79) | 0.019   |
| <b>Marital Status</b>   |              |                  |         |                  |         |
| Divorced                | 105          | 1                |         | Ref              |         |
| Living together         | 55           | 1.5(0.63-3.53)   | 0.354   | 2.03(0.79-5.21)  | 0.141   |
| Married                 | 154          | 1.45(0.73-2.85)  | 0.280   | 1.91(0.90-4.04)  | 0.088   |
| Never Married           | 103          | 1.725(0.84-3.53) | 0.136   | 2.03(0.88-4.64)  | 0.093   |
| Widowed                 | 61           | 1.78(0.79-4.01)  | 0.160   | 1.74(0.70-4.32)  | 0.227   |
| <b>Residence area</b>   |              |                  |         |                  |         |
| Sub-urban               | 200          | 1                |         | Ref              |         |
| Urban                   | 278          | 0.61(0.38-0.96)  | 0.034   | 0.47(0.27-0.82)  | 0.009   |
| <b>Source income</b>    |              |                  |         |                  |         |
| No                      | 85           | 1                |         | Ref              |         |
| Yes                     | 393          | 0.74(0.422-1.30) | 0.297   | 0.84(0.42-1.67)  | 0.628   |
| <b>Type of Facility</b> |              |                  |         |                  |         |

|                           |     |                 |       |                   |       |
|---------------------------|-----|-----------------|-------|-------------------|-------|
| <b>Dispensary</b>         | 256 | 1               |       | Ref               |       |
| <b>Health Center</b>      | 124 | 1.67(0.95-2.93) | 0.071 | 0.88(0.43-1.79)   | 0.737 |
| <b>Hospital</b>           | 40  | 1.83(0.80-4.17) | 0.149 | 1.13 (0.37-3.42)  | 0.828 |
| <b>Referral Hospital</b>  | 58  | 4.14(2.19-7.83) | 0.000 | 8.23(1.19- 56.59) | 0.032 |
| <b>Provider Type</b>      |     |                 |       |                   |       |
| <b>Clinical Officer</b>   | 196 | 1               |       | Ref               |       |
| <b>Nurse</b>              | 97  | 0.33(1.13-0.84) | 0.020 | 0.34(0.70-4.42)   | 0.038 |
| <b>Doctor</b>             | 185 | 2.24(1.37-3.66) | 0.001 | 3.77(1.72-8.27)   | 0.001 |
| <b>Staff Level</b>        |     |                 |       |                   |       |
| <b>Inadequate</b>         | 6   | 1               |       | Ref               |       |
| <b>Adequate</b>           | 19  | 0.82(0.47-1.44) | 0.500 | 0.31(0.13-0.76)   | 0.010 |
| <b>Trained Staff</b>      |     |                 |       |                   |       |
| <b>No</b>                 | 16  | 1               |       | Ref               |       |
| <b>Yes</b>                | 9   | 2.30(1.33-3.96) | 0.003 | 0.23(0.04-1.34)   | 0.103 |
| <b>Supervision Status</b> |     |                 |       |                   |       |
| <b>No</b>                 | 15  | 1               |       | Ref               |       |
| <b>Yes</b>                | 10  | 2.09(1.32-3.30) | 0.002 | 0.69 (0.34-1.41)  | 0.319 |
| <b>Tool (MUAC)</b>        |     |                 |       |                   |       |
| <b>No</b>                 | 17  | 1               |       |                   |       |
| <b>Yes, assigned</b>      | 7   | 2.59(1.61-4.18) | 0.000 | 1.70(0.955-3.04)  | 0.071 |
| <b>Yes, shared</b>        | 1   | 1.07(0.30-3.84) | 0.908 |                   |       |

181

## 182 Quantitative Findings

183 Facilitators to adhering to guideline were training and competencies, organizational  
 184 support, and patient education. Barriers included resource limitations, staff turnover, and  
 185 documentation challenges “Table 4”.

186 **Table 4: Facilitators and barriers in adhering to the guideline.**

| Categories                                | Subcategories             | Codes                                                                              |
|-------------------------------------------|---------------------------|------------------------------------------------------------------------------------|
| 1. Facilitators to Adhering to Guidelines | Training and Competencies | Received training programs; Competencies; skills; knowledge; guidelines awareness. |
|                                           | Organizational Support    | Leadership support; interdepartmental coordination                                 |
|                                           | Patient Education         | Regular educational sessions; Integrated health education programs.                |
| 2. Barriers to Adhering to Guidelines     | Resource Limitations      | Insufficient funding; Lack of nutritional supplements; patient economic status     |

---

|                          |                                                                                     |
|--------------------------|-------------------------------------------------------------------------------------|
| Staff turnover           | High staff turnover; time constraints; workload; Inadequate training for new staff. |
| Documentation Challenges | Poor documentation by healthcare providers; Lack of nutritional indicator.          |

---

187

## 188 Training and Competencies.

189 In this study, healthcare providers understand the importance of adhering to national  
190 nutritional guidelines for PLHIV. Their knowledge and abilities have improved greatly as a result  
191 of the training programs offered by different organizations.

192 *"I have attended around ten to fifteen nutrition training sessions related to the national nutrition*  
193 *guidelines Training has significantly improved my skills, they have significantly improved my*  
194 *competency, especially those from MUHAS we understand many things now... (IDI participant 13)*

## 195 Organizational support and Guideline.

196 Participants pointed that effective leadership has shown a crucial role in ensuring  
197 adherence  
198 to nutritional guidelines, particularly in the context of managing HIV. It involves not just  
199 supervision but also fostering a supportive and motivating environment for staff to consistently  
200 meet established standards.

201 *"The specific ways our leaders use involve internal supervision, which is conducted to monitor the*  
202 *clients served throughout the week. This is because there is something called 'backup.' When this*  
203 *backup is sent, it goes primarily to the Medical Officer In charge, who reviews it since they are*  
204 *the leaders, we have here..." (IDI participant 3)*

205 This proactive leadership ensures that staff are well-informed about guidelines and receive  
206 ongoing support and oversight, promoting a culture of continuous improvement.

207 *"Our leaders remind us every day to follow the guidelines. They provide us with the guidelines,*  
208 *which we read regularly. We also have weekly meetings where they guide us on following the*  
209 *guidelines.....They help by providing tools designed to guide us, which they regularly monitor*  
210 *these tools to ensure we are following the guidelines. They check and review the tools, which helps*  
211 *remind us of anything we might have forgotten."* (IDI participant 7)

212 Patient Education.

213 Participant explained that Regular educational sessions are essential for enhancing patients'  
214 understanding of nutrition, especially for those with HIV. These sessions offer ongoing, organized  
215 opportunities to learn about proper nutrition and its significance in managing overall health.

216 *"We usually provide education every morning before starting services at 7:30 am. The education*  
217 *we provide covers many topics, including nutrition, because the medication they take requires*  
218 *food. Without sufficient education, people cannot understand this, so we emphasize the importance*  
219 *of food, the importance of leafy vegetables, lifestyle nutrition, and which foods are not good for*  
220 *health."* (IDI participant 9)

221 Resource Limitation.

222 Nutritional supplements have been inconsistent, often reliant on fluctuating external funds,  
223 this leads to period of unavailability of essential nutritional supplements, which it negatively  
224 impacts the health and nutrition of PLHIV.

225 *"Unfortunately, we're facing challenges. We lack therapeutic and supplemental foods, which*  
226 *hinders our progress. A client comes in with needs, really needs nutritional supplements. So, just*  
227 *talking to them and telling them to do one, two, three things set us back. It's frustrating; there's no*  
228 *perfect way to express this"*. (IDI participant 8)

229 Staff Turnover.

230 Participant pointed out staff turnover in healthcare, especially in complex care settings like  
231 HIV treatment, compromises patient care by disrupting continuity and overburdening remaining  
232 staff.

233 *"When you talk about the reduction in healthcare providers going on leave, it significantly affects*  
234 *service delivery because, for example, here at Goba, we have very few staff members. So, when*  
235 *one staff member leaves, the workload becomes much heavier, especially in serving our clients....*  
236 *Therefore, staff turnover impacts our adherence to guidelines because you won't be able to do*  
237 *everything that is required for the patient."* (IDI participant 3)

238 Documentation Challenges.

239 Poor documentation and the absence of clear nutritional care standards are critical gaps  
240 compromising healthcare quality. Incomplete records and lack of specific indicators hinder  
241 effective patient care and outcomes.

242 *"Those of us working in the CTC have indicators, so our major task is to engage with those*  
243 *indicators..... We concentrate on working with these indicators. For example, for viral load*  
244 *suppression, we implement all mechanisms to ensure it increases..... However, for nutrition,*  
245 *we don't have such an indicator, which is a challenge..."*(IDI participant 4)

## 246 **Discussion**

247 Only nineteen percent of PLHIV received care which fully adhered to the National  
248 Nutrition Guidelines, a rate significantly lower than regions like Ethiopia where adherence ranges  
249 from 36.3% to 41% [20]. The universal implementation of follow-up care and anthropometric  
250 assessments reflects a commitment to some aspects of nutritional care, but highlights  
251 insufficiencies in holistic patient management, echoing WHO recommendations for



252 comprehensive care [21, 22]. Only one percent of participants received essential micronutrient  
253 supplements, indicative of systemic incapacities including supply chain failures. This deficiency  
254 has significant implications for immune function and health in HIV-infected individuals,  
255 underscoring a gap that is starkly highlighted by WHO's emphasis on the importance of these  
256 nutrients [23]. Clinical nutritional assessments were performed for sixty percent of participants,  
257 suggesting moderate adherence. However, less than half received dietary assessments, side effects  
258 monitoring, hygiene assessments, and nutrition counseling, pointing to significant gaps in  
259 nutritional management. These findings are consistent with higher rates of dietary assessments and  
260 nutrition counseling reported in studies from Kenya and Uganda, suggesting a regional disparity  
261 in adherence practices [24, 25].

262 Educational level was a prominent determinant of adherence, with individuals having  
263 higher education showing significantly better compliance, underlining the importance of health  
264 literacy in guideline adherence. This finding is supported by a study in Ghana, showing that  
265 education correlates strongly with better nutritional outcomes [26]. The type of healthcare facility  
266 also critically influenced adherence, with referral hospitals achieving the highest rates (40%) due  
267 to better resources and specialized staffing, contrasting sharply with dispensaries that showed only  
268 10% adherence, highlighting the resource disparity across facility levels. This pattern is echoed in  
269 Malawi, where private health facilities noted higher adherence rates [27]. Provider type was  
270 another key factor, with doctors achieving higher adherence in their care compared to nurses,  
271 suggesting that provider training and qualifications play significant roles in guideline adherence.  
272 Resource availability within healthcare facilities also had a substantial impact, with well-resourced  
273 facilities demonstrating higher adherence, similar to findings from Mozambique where better-  
274 equipped facilities saw more frequent patient visits [28].

275 Consistent training was reported to be facilitator that linked to improved healthcare  
276 delivery, similar to findings by Sunguya et al. (2013), which showed significant enhancements in  
277 health workers' nutrition knowledge post-training [29]. Strong organizational leadership and  
278 robust feedback mechanisms, was identified as another facilitator, enhancing adherence by  
279 enabling prompt corrections to deviations from protocols, echoing a study in Mozambique that  
280 highlighted the impact of healthcare service availability on care-seeking behaviors.  
281 Interdepartmental coordination was essential for integrated patient care, especially for HIV  
282 patients requiring multifaceted approaches, aligning with the Mozambican study's emphasis on  
283 facility type and resource levels influencing healthcare decisions [28]. Patient education was  
284 pivotal in improving health outcomes, supported by findings from Nigeria showing higher  
285 adherence rates among patients educated in private health facilities [30].

286 Conversely, significant barriers included resource limitations, particularly nutritional  
287 supplements, which directly affected care quality, a challenge also noted in Mozambique [28].  
288 Staffing turnover and shortages posed substantial barriers, increasing workloads and potentially  
289 leading to caregiver burnout, necessitating strategic workforce planning to maintain care  
290 continuity, a strategy supported by findings from Uganda [31, 32]. Documentation challenges  
291 impaired nutritional care quality, where poor practices hindered effective intervention monitoring,  
292 a situation improved by standardized documentation practices as shown in studies by Kight et al.  
293 (2019) advocating for electronic health records in the country [33]. Economic constraints also  
294 critically impacted patients' adherence to nutritional guidelines, with financial hardships forcing  
295 compromises in dietary quality, a dynamic observed in study by Correia (2017) on the interplay  
296 between economic conditions and healthcare outcomes [34]. Integrated support services providing

297 both nutritional and economic assistance were deemed vital for enabling patients to adhere to  
298 dietary recommendations effectively as supported by study by (Håkonsen et al., 2019) [35, 36].

299 External validity of findings is limited by the unique healthcare infrastructure and socio  
300 economic context of Dar es Salaam; hence they may not accurately represent the conditions in less  
301 developed regions. Additionally, response bias is a concern, as data from patients and healthcare  
302 providers were partially self-reported, the inclusion of an observational component of the study  
303 helped to mitigate this bias.

## 304 **Conclusion**

305 Our study found a significant gap in adherence to national nutritional guidelines among  
306 HIV patients, with only nineteen percent receiving care that fully adhered to the national nutritional  
307 guideline, much lower than similar studies elsewhere. This underscores a critical need for  
308 improvement. While follow-up care and anthropometric assessments were robustly implemented,  
309 a severe shortfall in essential micronutrient supplements suggests systemic failures, potentially  
310 involving supply chain and funding issues. Variations in adherence across different healthcare  
311 facilities indicate that resource distribution, staff training, and facility capabilities are crucial for  
312 guideline compliance. Socio-demographic factors such as education levels and geographical  
313 location also significantly influenced adherence outcomes. Enhancing training for healthcare  
314 providers through continuous, independent programs to maintain high standards of care,  
315 strengthening resource allocation to lower-tier health facilities, and expanding patient education  
316 to improve engagement and adherence. Additionally, addressing systemic barriers to ensure  
317 consistent supply of essential supplements and improving documentation practices are essential  
318 for effective patient management and improved health outcomes.

319

## 320 Acknowledgement

321 The authors wish to acknowledge dedicated academic staff at the School of Public  
322 Health, and the Department of Development Studies at MUHAS, the Regional AIDS Control  
323 Coordinator office and the CTC clinics in Dar es salaam whose organized efforts, professional  
324 guidance, and unwavering support created a research-friendly environment that was crucial to  
325 the conceptualization and implementation of this study.

## 326 Reference

- 327
- 328 [1] World Health Organization. Global progress reports.  
329
- 330 [2] Singhato A, Khongkhon S, Rueangsri N, et al. Effectiveness of Medical Nutrition Therapy  
331 to Improve Dietary Habits for Promoting Bone Health in People Living with Chronic HIV.  
332 *Ann Nutr Metab* 2021; 76: 313–321.  
333
- 334 [3] United Nation programme on HIV/AIDS. Global HIV statistics People living with HIV  
335 People living with HIV accessing antiretroviral therapy New HIV infections AIDS-related  
336 deaths.  
337
- 338 [4] Seid A, Seid O, Workineh Y, et al. Prevalence of undernutrition and associated factors  
339 among adults taking antiretroviral therapy in sub-Saharan Africa: A systematic review  
340 and meta-analysis. *PLoS One*; 18. Epub ahead of print 2023. DOI:  
341 10.1371/journal.pone.0283502.  
342
- 343 [5] John-Joy Owolade A, Abdullateef RO, Adesola RO, et al. Malnutrition: An underlying  
344 health condition faced in sub Saharan Africa: Challenges and recommendations. *Annals*  
345 *of Medicine and Surgery*; 82. Epub ahead of print 2022. DOI:  
346 10.1016/j.amsu.2022.104769.  
347
- 348 [6] Tanzania Food and Nutrition Centre (TFNC). *National Guidelines For Nutrition Care And*  
349 *Support OF People With HIV*. 2016.  
350

- 351 [7] Ndakala FN, Oyugi JO, Oluka MO. HIV-Associated Polyneuropathy in Resource-Limited  
352 Settings: Genetic Predisposition and Vitamin Variations. *World J AIDS* 2017; 07: 106–121.  
353
- 354 [8] Weiser SD, Young SL, Cohen CR, et al. Conceptual framework for understanding the  
355 bidirectional links between food insecurity and HIV/AIDS. *American Journal of Clinical*  
356 *Nutrition* 2011; 94: 1729S-1739S.  
357
- 358 [9] Kabalimu TK, Sungwa E, Lwabukuna WC. Malnutrition and associated factors among  
359 adults starting on antiretroviral therapy at PASADA Hospital in Temeke District, Tanzania.  
360 *Tanzan J Health Res*; 20.  
361
- 362 [10] Takarinda KC, Mutasa-Apollo T, Madzima B, et al. Malnutrition status and associated  
363 factors among HIV-positive patients enrolled in ART clinics in Zimbabwe. *BMC Nutr* 2017;  
364 3: 1–11.  
365
- 366 [11] Fathima AS, Madhu M, Udaya Kumar V, et al. Nutritional Aspects of People Living with  
367 HIV (PLHIV) Amidst COVID-19 Pandemic: an Insight. *Curr Pharmacol Rep* 2022; 8: 350–  
368 364.  
369
- 370 [12] Delisle H, Shrimpton R, Blaney S, et al. Capacity-building for a strong public health  
371 nutrition workforce in lowresource countries. *Bull World Health Organ* 2017; 95: 385–  
372 388.  
373
- 374 [13] NACP. Tanzania Hiv Impact Survey (This) 2016-2017. *Tanzania HIV Impact Survey (THIS)*  
375 *2016-2017* 2018; 2016–2017.  
376
- 377 [14] Kabalimu T, Sungwa E, Lwabukuna W. Malnutrition and associated factors among adults  
378 starting on antiretroviral therapy at pasada hospital in Temeke district, Tanzania. *Tanzan*  
379 *J Health Res*; 20.  
380
- 381 [15] Heath K, Levi J, Hill A. The Joint United Nations Programme on HIV/AIDS 95-95-95  
382 targets: worldwide clinical and cost benefits of generic manufacture. *Aids* 2021; 35:  
383 S197–S203.  
384
- 385 [16] Aber H, Kisakye AN, Babirye JN. Adherence to complementary feeding guidelines among  
386 caregivers of children aged 6-23 months in Lamwo district, rural Uganda. *Pan African*  
387 *Medical Journal* 2018; 31: 1–11.  
388
- 389 [17] Golley RK, Smithers LG, Mittinty MN, et al. An index measuring adherence to  
390 complementary feeding guidelines has convergent validity as a measure of infant diet  
391 quality. *Journal of Nutrition* 2012; 142: 901–908.  
392
- 393 [18] TDHS. Demographic and Health Survey and Malaria Indicator Survey. *Paper*  
394 *Knowledge Toward a Media History of Documents* 2022; 1–23.

- 395  
396 [19] USAID’s SPRING Project. Tool for Rapid Evaluation of Facility-Level Nutrition Assessment,  
397 Counseling, and Support: A User’s Guide.  
398  
399 [20] MoH. National Guidelines for HIV/AIDS and Nutrition in Ethiopia.  
400  
401 [21] WHO. Nutritional care and support for people living with HIV/AIDS A training course.  
402  
403 [22] Mirzazadeh A, Eshun-Wilson I, Thompson RR, et al. Interventions to reengage people  
404 living with HIV who are lost to follow-up from HIV treatment programs: A systematic  
405 review and meta-analysis. *PLoS Med* 2022; 19: e1003940.  
406  
407 [23] WHO Library Cataloguing-in-Publication Data WHO Technical Consultation on Nutrient  
408 Requirements for People Living with HIV/AIDS (2003 : Geneva, Switzerland) Nutrient  
409 requirements for people living with HIV/AIDS : report of a technical consultation.  
410  
411 [24] Mwangi A. The Effects of Nutritional Knowledge on the Dietary Practices of People Living  
412 with HIV in Kayole Division, Nairobi-Kenya. *International Journal of Nutrition and Food*  
413 *Sciences*,  
414 [https://www.academia.edu/46977136/The\\_Effects\\_of\\_Nutritional\\_Knowledge\\_on\\_the\\_](https://www.academia.edu/46977136/The_Effects_of_Nutritional_Knowledge_on_the_Dietary_Practices_of_People_Living_with_HIV_in_Kayole_Division_Nairobi_Kenya)  
415 [Dietary\\_Practices\\_of\\_People\\_Living\\_with\\_HIV\\_in\\_Kayole\\_Division\\_Nairobi\\_Kenya](https://www.academia.edu/46977136/The_Effects_of_Nutritional_Knowledge_on_the_Dietary_Practices_of_People_Living_with_HIV_in_Kayole_Division_Nairobi_Kenya) (2014,  
416 accessed 17 June 2024).  
417  
418 [25] González-Alcaide G, Menchi-Elanzi M, Nacarapa E, et al. HIV/AIDS research in Africa and  
419 the Middle East: Participation and equity in North-South collaborations and relationships.  
420 *Global Health* 2020; 16: 1–18.  
421  
422 [26] Nanewortor BM, Saah FI, Appiah PK, et al. Nutritional status and associated factors  
423 among people living with HIV/AIDS in Ghana: cross-sectional study of highly active  
424 antiretroviral therapy clients. *BMC Nutr* 2021; 7: 1–8.  
425  
426 [27] Chirambo L, Valeta M, Banda Kamanga TM, et al. Factors influencing adherence to  
427 antiretroviral treatment among adults accessing care from private health facilities in  
428 Malawi. *BMC Public Health* 2019; 19: 1–11.  
429  
430 [28] Anselmi L, Lagarde M, Hanson K. Health service availability and health seeking behaviour  
431 in resource poor settings: evidence from Mozambique. *Health Econ Rev* 2015; 5: 1–13.  
432  
433 [29] Sunguya BF, Poudel KC, Mlunde LB, et al. Nutrition training improves health workers’  
434 nutrition knowledge and competence to manage child undernutrition: A systematic  
435 review. *Front Public Health* 2013; 1: 63771.  
436

- 437 [30] Monjok E, Smesny A, Okokon IB, et al. Adherence to antiretroviral therapy in Nigeria: an  
438 overview of research studies and implications for policy and practice. *HIV/AIDS -*  
439 *Research and Palliative Care* 2010; 2: 69–76.  
440
- 441 [31] Lugada E, Ochola I, Kirunda A, et al. Health supply chain system in Uganda: assessment of  
442 status and of performance of health facilities. *J Pharm Policy Pract*; 15. Epub ahead of  
443 print 1 December 2022. DOI: 10.1186/S40545-022-00452-W.  
444
- 445 [32] MoH. Uganda Services Availability and Readiness Assessment 2013 Summary Report: Key  
446 findings in figures Uganda 2013 Service Availability and Readiness (SARA) Index GENERAL  
447 SERVICE READINESS.  
448
- 449 [33] Adeniyi AO, Arowoogun JO, Chidi R, et al. The impact of electronic health records on  
450 patient care and outcomes: A comprehensive review.  
451 <https://wjarr.com/sites/default/files/WJARR-2024-0592.pdf> 2024; 21: 1446–1455.  
452
- 453 [34] Raji RO. Nutrition Intake, Health Status, Education and Economic Growth: A Causality  
454 Investigation. *Econometric Research in Finance* 2020; 5: 79–102.  
455
- 456 [35] SNAP Is Linked With Improved Health Outcomes and Lower Health Care Costs | Center  
457 on Budget and Policy Priorities, [https://www.cbpp.org/research/food-assistance/snap-is-](https://www.cbpp.org/research/food-assistance/snap-is-linked-with-improved-health-outcomes-and-lower-health-care-costs)  
458 [linked-with-improved-health-outcomes-and-lower-health-care-costs](https://www.cbpp.org/research/food-assistance/snap-is-linked-with-improved-health-outcomes-and-lower-health-care-costs) (accessed 17 June  
459 2024).  
460
- 461 [36] Behrman R. THE IMPACT OF HEALTH AND NUTRITION ON EDUCATION.  
462  
463  
464  
465  
466  
467
